# Supplementary material for: Distinct Activities of Exonuclease 1 and Flap Endonuclease 1 at Telomeric G4 DNA
Source: PubMed Central journal article supplement (PMC2811187; doi:10.1371/journal.pone.0008908), 2010-01-26

**Figure S1**

**A**

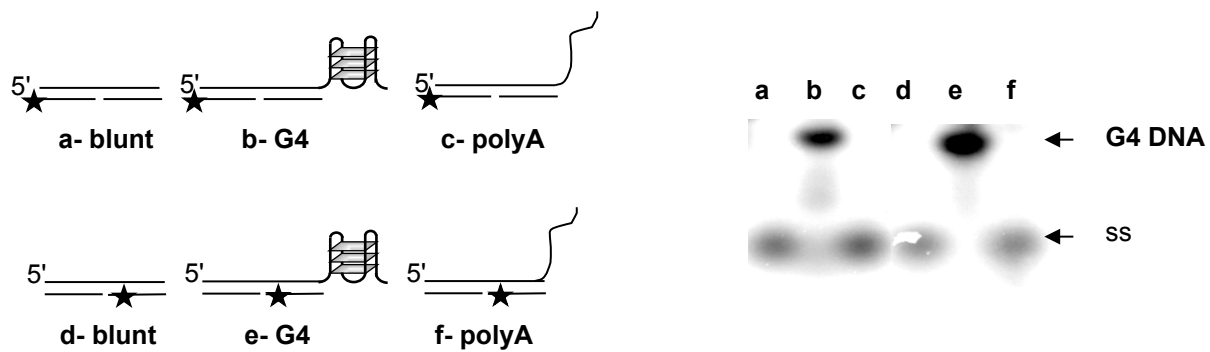

**B**

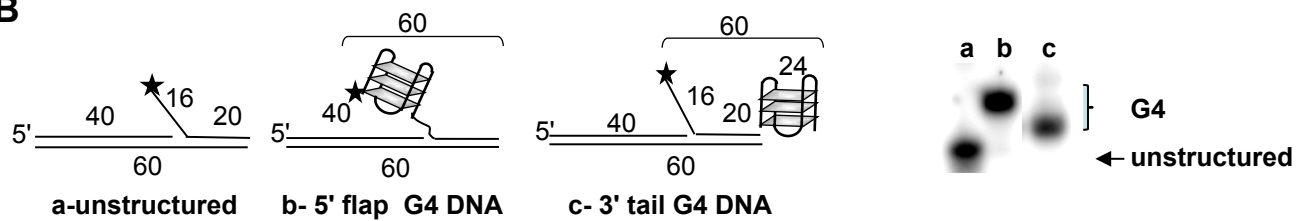

Supplement: pone.0008908.s001.pdf [file pone.0008908.s001.pdf]
